---

**An unusually long non-coding region in rat lens  $\alpha$ -crystallin messenger RNA**

---

Rob J.M.Moormann\*, Huub M.W.van der Velden\*, Huub J.Dodemont†, Peter M.Andreoli\*,  
Hans Bloemendal† and John G.G.Schoenmakers\*

\*Department of Molecular Biology, University of Nijmegen, Toernooiveld, 6525 ED Nijmegen, and

†Department of Biochemistry, University of Nijmegen, Geert Grooteplein 21, 6525 EZ Nijmegen,  
The Netherlands

---

Received 5 August 1981

---

**ABSTRACT**

Most of the mRNA sequence coding for the  $\alpha A_2$  chain of the ocular lens protein  $\alpha$ -crystallin from rat, has been determined by sequencing cloned DNA copies of this mRNA. The 892-base pair cDNA sequence encompasses all but 52 N-terminal amino acids of the  $\alpha A_2$  chain. It lacks the sequence characteristic for the 22 extra amino acids inserted in the  $\alpha A_2$ -like chain, named  $\alpha A^{Ins}$ . A stretch of 583 nucleotides, representing more than 50% of the entire mRNA sequence, is located 3' wards of the  $\alpha A_2$  coding sequence. It contains the characteristic AAUAAA signal involved in poly(A)-addition and represents an unexpectedly long non-coding region. Examination of the total cytoplasmic poly(A)RNA of rat lens by filter-hybridization and subsequent translation of the electrophoretically separated mRNA fractions shows that the  $\alpha A_2$  chain is encoded by mRNA species which are distinct from the  $\alpha A^{Ins}$ -encoding mRNA. No evidence is obtained for an extensive size heterogeneity in the 3' untranslated regions of these two different rat lens mRNAs.

**INTRODUCTION**

The structural protein of the ocular lens,  $\alpha$ -crystallin, has been studied in great detail with emphasis on subunit composition, biosynthesis and structure (1,2). It is the predominant biosynthetic product in the adult vertebrate lens and represents a convenient example of controlled gene expression in terminally differentiated cells. The high molecular weight protein is composed of two types of primary gene products, named  $\alpha A_2$  (mol. wt. 19,832) and  $\alpha B_2$  (mol.wt. 20,070), which show about 60% of homology suggesting they originate from one ancestral gene. The synthesis of  $\alpha B_2$  (175 amino acids) is directed by a message of the expected size, namely 10S mRNA. The  $\alpha A_2$  chains (173 amino acids) are encoded, however, by a rather long 14S mRNA. Though the latter mRNA of about 1300 nucleotides is theoretically large enough to encode two polypeptides of that size and Chen and Spector (3) recently put forward that the  $\alpha A_2$  mRNA of calf lens is of bicistronic character, we disfavour such a conclusion.

In view of the primary structure of many eukaryotic mRNAs determined in

recent years, the length of the 5' and 3' non-coding regions can vary to a large extent (4-6). Our findings that the  $\alpha A_2$  and  $\alpha B_2$  chains are synthesized on mRNAs with a striking difference in length might be explained on the basis of the observed variance in non-coding regions. Although such a region of about 750 nucleotides is unusually long for a eukaryotic mRNA, its occurrence is apparently not limited to rat lens since 14S mRNA coding for an  $\alpha A_2$  chain of about 175 amino acids only has also been demonstrated in other species, like chicken (7) and calf (8). Another point of interest is that in rat lens an additional  $\alpha A_2$  chain has been detected, named  $\alpha A^{Ins}$ , with 22 extra amino acids inserted in an internal position of the molecule. Its synthesis is also directed by a 14S mRNA (9,10). In how far this insertion reflects a distortion of the splicing mechanism (11) in rat lens, has still to be ascertained.

To address these questions and as a basis for further research we have cloned the rat 14S mRNA as a series of recombinant DNA plasmids and have determined the nucleotide sequence of these clones. Our conclusion from the sequence data is that the clones represent  $\alpha A_2$  sequences rather than  $\alpha A^{Ins}$  sequences. No coding function can be assigned to the 3' stretch of about 590 nucleotides which apparently represents an extremely long non-coding part of this crystallin mRNA in rat.

### MATERIALS AND METHODS

#### Isolation of recombinant plasmid DNA

The construction of bacterial plasmids containing sequences homologous to rat lens crystallin mRNAs inserted into the PstI-site of pBR322 by oligo-dG-dC tailing and the subsequent amplification by transformation of *E.coli*  $\chi 1776$  has been described elsewhere (12). After characterization of recombinants by a positive hybridization assay (12) appropriate candidates were taken for transformation of the EK1 host *E.coli* HB101. All manipulations were carried out in a Category II containment laboratory as recommended by the Netherlands Committee *Ad Hoc* on Recombinant DNA Research. Recombinant plasmid DNA was isolated by the cleared lysate procedure of Clewell and Helinski (13) and further purified by CsCl density gradient centrifugation.

#### Isolation, gel electrophoresis and hybridization of RNA

Total cytoplasmic poly(A)RNA from lenses of 4-day old rats were isolated essentially as described by Palmiter (14).

Electrophoresis of cytoplasmic poly(A)RNA (20  $\mu$ g) was performed on a

vertical 35 cm long 1.5% agarose gel in the presence of 10 mM  $\text{CH}_3\text{HgOH}$  (15). For blot-hybridization the RNA was transferred to nitrocellulose paper according to the procedure of Thomas (16) and hybridized with  $^{32}\text{P}$ -labelled, nick-translated DNA probes from  $\alpha$ -crystallin-specific cDNA clones using the conditions described by Wahl *et al.* (17).

#### Translation of RNA and analysis of translation products

After electrophoresis of RNA, one half of the gel was used for blotting and hybridization to the  $\alpha$ -crystallin-specific cDNA clone pRLQA-1. The other half was used for translation experiments. The regions of the gel which hybridized to  $^{32}\text{P}$ -labelled pRLQA-1 DNA were sliced into 1-mm segments. RNA was isolated from the gel segments by homogenizing each slice in 0.3 ml of 50 mM Tris-HCl, pH 7.5, 500 mM NaCl, 5 mM EDTA, 10 mM DTT, 0.2% SDS containing 10  $\mu\text{g}$  of *E. coli* tRNA and extracting overnight with buffer-saturated phenol, followed by re-extraction of the water phase with phenol and chloroform-isoamylalcohol (24:1). After two successive ethanol precipitations the RNA pellet was dissolved in 5  $\mu\text{l}$  water. Aliquots of 1  $\mu\text{l}$  were assayed in a nuclease-treated rabbit reticulocyte lysate (18). The translation products were analysed on a 13% polyacrylamide-SDS gel. Autoradiography was performed at  $-80^\circ\text{C}$  after processing according to Bonner and Laskey (19).

#### Restriction endonuclease analysis and DNA sequencing

Restriction digests of plasmid DNA were electrophoresed in 2% agarose horizontal slab gels containing 40 mM Tris, 20 mM sodium acetate, 2 mM EDTA, pH 7.8. The isolation and purification of restriction fragments and the 5' end labelling with T4 polynucleotide kinase was carried out as described previously (20). DNA sequencing was performed according to the method of Maxam and Gilbert (21). Fragments were processed through the G, G+A, C+T, C and A+C specific, limited chemical cleavage reactions and applied to 0.4 mm thin 6%, 8% and 20% polyacrylamide gels (22).

#### RESULTS AND DISCUSSION

We recently reported the construction of recombinant plasmids containing sequences homologous to several rat lens crystallin mRNAs (12). Plasmid DNA of the various crystallin-specific clones selected were analysed for insert length and further characterized by hybrid-selected translation.

Two representative clones, pRLQA-1 and pRLQA-3, which directed the synthesis of  $\alpha\text{A}_2$  chains and concomitantly the synthesis of  $\alpha\text{A}^{\text{Ins}}$  chains, were

selected for sequencing according to the method of Maxam and Gilbert (21). The restriction map of each insert relative to the flanking pBR322 sequences, of which only the nearest *Hinf*I sites are indicated, is shown in Fig. 1. The positions of the various restriction enzyme cleavage sites found in each map already suggest that both DNA inserts represent overlapping sequences. pRLQA-1 carries a more extended 5' region whereas pRLQA-3 has a more extended region at its 3' end. The strategy used in determining the nucleotide sequence of each insert is included in Fig. 1. To ensure the reliability of the final sequence, most of the sequence operations were carried out at least twice. Furthermore, the nucleotide sequence obtained has been determined independently from two different clones which appear to have a very large

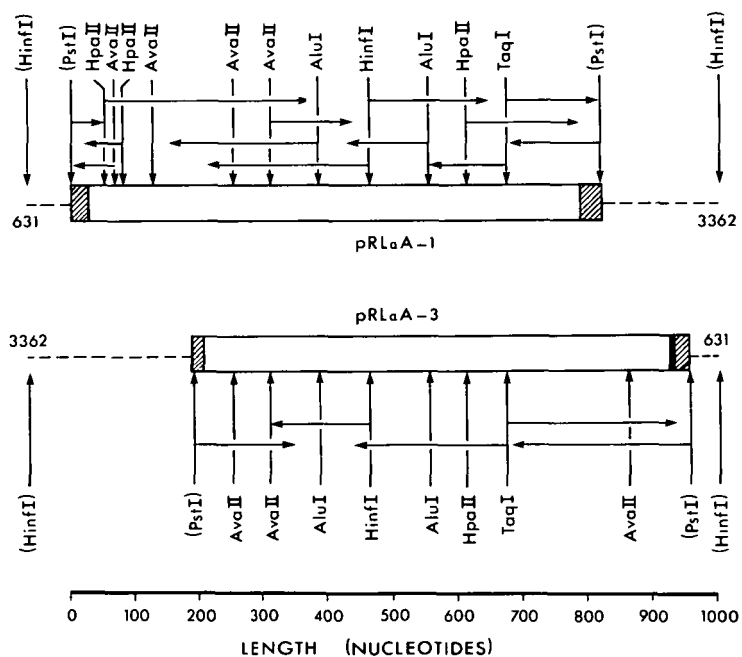

**Figure 1**  
Restriction map of pRLQA-1 and pRLQA-3 showing the restriction sites used for sequence analysis of the rat lens  $\alpha A_2$ -crystallin mRNA. The horizontal arrows are indicative for the orientation and approximate length of sequences obtained. The cleavage coordinates of the *Hinf*I-sites neighbouring the *Pst*I-site of pBR322 are indicated (28). Note that the cDNAs are inserted in a reversed orientation in the vector. The open boxes represent mRNA sequences, the hatched boxes are the poly(dG-dC)-tracks, the black box in pRLQA-3 represents a stretch of seven A-residues which is probably a remnant of the poly(A)-track of the mRNA template used in cDNA synthesis

part of their final DNA sequence in common. The combined nucleotide sequence of the  $\alpha_2$ -crystallin mRNA as deduced from the sequence data of each clone is given in Fig. 2. The regions flanking the insert in pRLQA-1 at the 5' and 3' side, extending to the plasmid *Hinf*I sites have the expected nucleotide sequence surrounding the *Pst*I site of insertion in the parent plasmid pBR322 (data not shown). Consequently, generation of two new *Pst*I sites by the host after insertion of DNA into the original *Pst*I site has occurred correctly. The length of the GC-linkers was found to be 30 base pairs at the 5' end and 29 base pairs at the 3' end of the mRNA sequence. The size of the crystallin mRNA sequence in pRLQA-1 as deduced from the sequence data is 759 base pairs. Its sequence is deprived of the hexanucleotide sequence AATAAA, considered to be the signal involved in polyadenylation (23,24), which suggests this DNA insert lacks a complete 3' region of the  $\alpha_2$  mRNA sequence.

The nucleotide sequence of the crystallin-specific DNA in the second clone, pRLQA-3, is 720 nucleotides long. By comparing this sequence with that of pRLQA-1, it appears that a sequence of 580 base pairs is identical in both inserts. From this observation we conclude that both clones contain a DNA copy which originates from the same mRNA template. pRLQA-3 contains in addition 126 nucleotides at its 3' end. This sequence encompasses the characteristic AATAAA sequence which is found 21 nucleotides upstream of the site of poly(A) addition.

The amino acid sequence of the rat lens  $\alpha_2$  polypeptide chain has been elucidated earlier (7). The nucleotide sequence from position 2 - 365, as given in Fig. 2, exactly fits the amino acid sequence in that it represents the sequence ranging from residue 53 to 173, *i.e.* the C-terminal serine residue of the  $\alpha_2$  chain. Another conclusion which could be drawn is that the clones analysed represent an  $\alpha_2$ -mRNA sequence and not an  $\alpha_2^{\text{Ins}}$ -mRNA sequence.  $\alpha_2^{\text{Ins}}$ , which is encoded also by a 14S mRNA, has 22 extra amino acids inserted between amino acid residue 63 (Glu) and 64 (Val) of the  $\alpha_2$  chain (7). The DNA sequence run of this particular region, shown in Fig. 3, fits the  $\alpha_2$  amino acid sequence only.

In our first study on lens mRNA we estimated that the 14S mRNA encoding the  $\alpha_2$  chain might theoretically comprise a coding region sufficiently long to direct the synthesis of two products of that size (8), although we gained experimental evidence which made the assumption of a bicistronic eukaryotic message very unlikely (25). In contrast, Chen and Spector (3) reported on the basis of product analysis after translation of 14S mRNA in a cell-free system that the message of calf lens might be bicistronic. The

```

                20                40
TC TTC CGC ACA GTG TTG GAC TCC GGC ATC TCT GAG GTC CGA TCT GAC CGG GAC AAG
  Phe Arg Thr Val Leu Asp Ser Gly Ile Ser Glu Val Arg Ser Asp Arg Asp Lys
    60                80                100
TTT GTC ATC TTC TTG GAT GTG AAG CAC TTC TCT CCT GAG GAC CTC ACC GTG AAG GTA
  Phe Val Ile Phe Leu Asp Val Lys His Phe Ser Pro Glu Asp Leu Thr Val Lys Val
    120                140                160
CTG GAA GAT TTC GTG GAG ATC CAT GGC AAA CAC AAC GAG AGG CAG GAT GAC CAT GGC
  Leu Glu Asp Phe Val Glu Ile His Gly Lys His Asn Glu Arg Gln Asp Asp His Gly
    180                200                220
TAC ATT TCC CGT GAA TTT CAC CGT CGC TAC CGT CTG CCT TCC AAT GTG GAC CAG TCC
  Tyr Ile Ser Arg Glu Phe His Arg Arg Tyr Arg Leu Pro Ser Asn Val Asp Gln Ser
    240                260                280
GCC CTC TCC TGC TCC TTG TCT GCG GAT GGC ATG CTG ACC TTC TCT GGC CCC AAG GTC
  Ala Leu Ser Cys Ser Leu Ser Ala Asp Gly Met Leu Thr Phe Ser Gly Pro Lys Val
    300                320                340
CAG TCT GGC TTG GAT GCT GGC CAC AGC GAG AGG GCC ATT CCC GTG TCA CGG GAG GAG
  Gln Ser Gly Leu Asp Ala Gly His Ser Glu Arg Ala Ile Pro Val Ser Arg Glu Glu
    360                380                400
AAG CCC AGC TCG GCA CCC TCG TCC TGA GC AGGCCTCGCC TTGGTTGTCC CCTGATGCC CTG
  Lys Pro Ser Ser Ala Pro Ser Ser
    420                440                460
ATCCATC TGCCAGGGG CCACAGCAA GAGTCTGCCT TCCTGACTTC TTTTCTTTCT CTTTGTTTCC T
    480                500                520                540
TTCCACTTT CTCAGAGGGC TGAGGATTG AGAGAGTGGC TTAAGAGCT TGGGGGTCT TGGCCTGAGA
    560                580                600
TGCTGCGGG TTCAGGGTGA CCCAGGCTCA ACACCAGCCG GTCAGAGGGA ATGATGGCAT TGAACTTT
    620                640                660
A AGATTTCTG TCCTCCTGGA AAGTGGCATC GAGCTCTGCC AAAGGCAGAG TGAATGGTGG CTAACCA
    680                700                720                740
ACC CCAAGAGCCC TGTCCAAGC CCCTGGATGG CAGCCTCCCA CCCCTTTGC CCACACTTAC CGCAG
  pRLQA-1 + 760                780                800
GCGTA TATGCTGGG↓ TCCAACAGTC CGCTTCTCTC ATGCCCTCTT CCTGTGACTT TCTTACTAT GTA
    820                840                860                880
GTATCGC TCCTGGGGAC CCTGATCACC CATGAGAATG GGGCCCTGGC AGAC AATAAA GAGCAGGTGA
CAAGCAAAAA AA

```

Figure 2

The combined nucleotide sequence of the rat lens  $\alpha_2$ -crystallin cDNA inserts in pRLQA-1 and pRLQA-3 and its deduced amino acid sequence. Numbers above each line refer to nucleotide positions. The boxed region specifies the nucleotide sequence involved in poly(A)-addition. The nucleotide sequence of pRLQA-1 ranges from 1-759, that of pRLQA-3 from 146-892

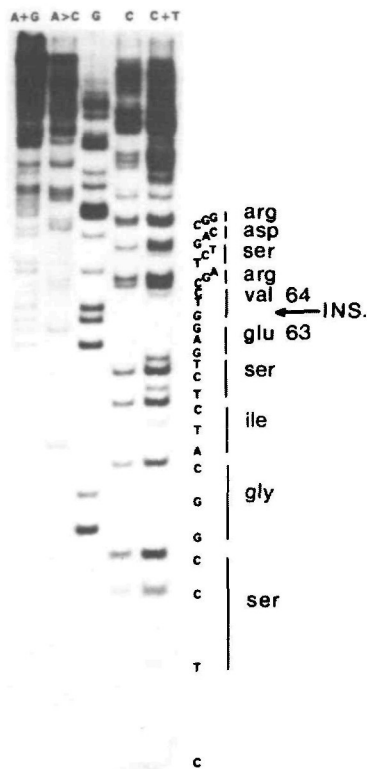

**Figure 3**  
 Autoradiogram of a sequencing gel showing the region around the amino acid residues 63(Glu) and 64(Val) of the  $\alpha_2$ -crystallin. The deduced amino acid sequence fits the known amino acid sequence of  $\alpha_2$  from rat lens and lacks the insertion of 22 extra amino acid residues between the residues 63-64 which is characteristic for the  $\alpha_2^{Ins}$  amino acid sequence (7).

nucleotide sequence established here for 14S mRNA argues strongly against a dual coding function. The coding frame given for the  $\alpha_2$ -mRNA is the only reading frame which is capable of directing a polypeptide significantly long to be considered. In the other two possible reading frames several termination codons are present which are randomly distributed, giving rise to very short polypeptides only.

Akusjärvi *et al.* (26) recently demonstrated that the non-coding part of the adenovirus hexon-mRNA discloses a novel adenovirus gene. In view with these findings we considered also the possibility that the 5' part of the DNA sequence, as demonstrated, codes for  $\alpha_2$  chains and that the 3' part codes (in part) for a crystallin-like protein of similar size as that of  $\alpha_2$ . The length of the region ranging from the C-terminal end of the  $\alpha_2$  coding sequence to the start of the poly(A)-tail comprises about 550 nucleotides and could theoretically code for a protein of such length. However,

in all three possible reading frames only 2 and 3 ATG triplets are present and in each case these ATG triplets are followed by several stop codons in the same phase at distances of 40 triplets or less. Therefore, we conclude that the 3' region of the  $\alpha A_2$  message, though comprising over 50% of the total mRNA sequence, has no coding function.

The significance of untranslated regions 3' ward of the protein coding sequence in eukaryotic mRNAs remains unclear despite considerable speculations. Kronenberg *et al.* (27) have presented evidence based on the translational capability of truncated globin mRNAs that argues against a major role for the 3' untranslated region. Moreover, multiple mRNAs coding for a single protein, and which differ primarily in the length of the 3' untranslated regions have been identified (4). To find out whether multiple  $\alpha A_2$ -crystallin mRNAs exist in rat lens and to acquire additional support for our conclusion that the mRNA coding for  $\alpha A^{\text{Ins}}$ -crystallin is distinct from the  $\alpha A_2$  mRNA, we have analysed total cytoplasmic rat lens poly(A)RNA in more detail. Poly(A)RNA was electrophoresed in the presence of  $\text{CH}_3\text{HgOH}$  (15). Thereafter, the RNA on one half of the gel was transferred to nitrocellulose paper and subsequently hybridized with  $^{32}\text{P}$ -labelled pRLQA-1 DNA. As noted before (*cf.* 12), after short electrophoretic runs only a single hybridizing band was apparent. This band could be resolved, however, into two distinct bands after prolonged electrophoresis (Fig. 4A), corresponding to RNA species of approximately 1300 and 1250 nucleotides. No hybridization occurred in the other regions of the gel, indicating that size heterogeneity of the  $\alpha$ -crystallin-specific mRNA is very unlikely. On the other hand, hybridization with pRLQA-1 DNA does not discriminate between  $\alpha A_2$  and  $\alpha A^{\text{Ins}}$ -specific sequences as these two proteins are very homologous in their amino acid sequence. To find out whether the two RNA bands represent two different  $\alpha A_2$  mRNAs which differ in length or that these bands represent  $\alpha A_2$  and  $\alpha A^{\text{Ins}}$  mRNA species, translation studies have been carried out. Of the second half of the agarose gel the region comprising the two RNA species was sliced into 2-mm fractions and the RNA contained in each fraction was translated in a rabbit reticulocyte lysate system. From the results presented in Fig. 4B, it is clear that the fraction(s) representing the 1250 nucleotide-long RNA were capable of synthesizing  $\alpha A_2$  polypeptide chains only, whereas synthesis of  $\alpha A^{\text{Ins}}$  polypeptides is only apparent in the fraction containing the 1300 nucleotide-long RNA. These data strongly suggest that the mRNAs coding for  $\alpha A^{\text{Ins}}$  and  $\alpha A_2$ -crystallin are distinctly different and can be well separated from each other. No evidence is obtained for the presence of  $\alpha A_2$  mRNA species



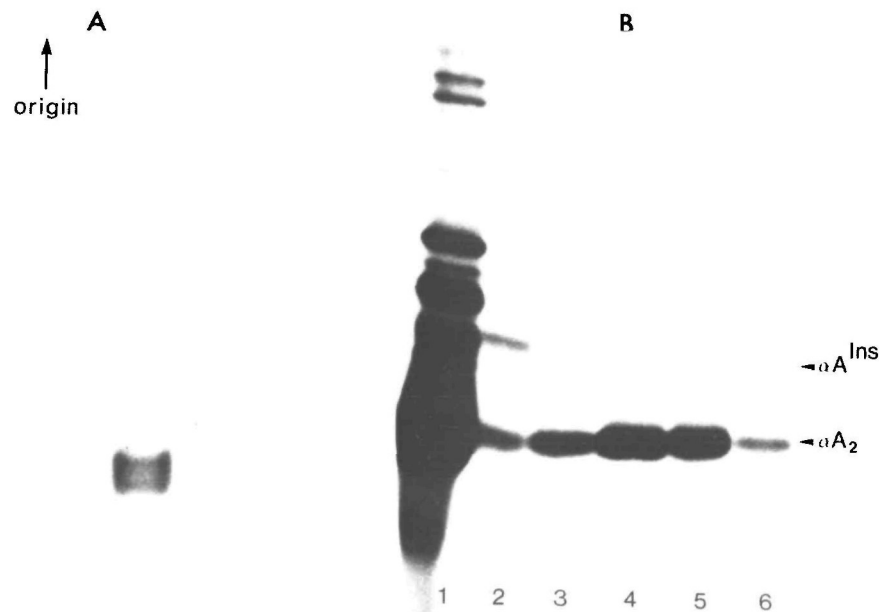

**Figure 4**

- A. Hybridization of total cytoplasmic rat lens poly(A)RNA with  $^{32}P$ -labeled pRL $\alpha A$ -1 DNA after electrophoresis of RNA in the presence of methylmercuri and transfer to nitrocellulose paper.
- B. Translation of the RNA contained in the various gel segments after electrophoresis of rat lens poly(A)RNA. The region of the gel containing the doublet band as visualised under A. was sliced into 2-mm segments. RNA was extracted from each segment as described under Materials and methods and translated in a nuclease-treated reticulocyte lysate. Lane 1 represents the translation products from the unfractionated poly(A)RNA, lane 2-6 show the polypeptides encoded by the RNA in the gel segments. The length of the RNA decreases from left to right.

which have truncated a very large part of their 3' sequence although a slight variance in the length of the non-coding region or the poly(A)-tail cannot be discriminated by our analysis. Further studies at the chromosomal level are needed to find out whether  $\alpha A^{Ins}$  and  $\alpha A_2$  mRNA originate from separate genes.

#### ACKNOWLEDGEMENTS

This research was supported by a grant from the Netherlands Foundation for Chemical Research (SON) with financial aid from The Netherlands Organization of Pure Research (ZWO).

REFERENCES

1. Bloemendal, H. (1977) *Science* 197, 127-138
2. Bloemendal, H. (1981) in *Molecular and Cellular Biology of the Eye Lens*, Bloemendal, H. Ed. pp. 5.1-5.12 Wiley, New York
3. Chen, J.H. and Spector, A. (1977) *Proc. Nat. Acad. Sci. USA* 74, 5448-5452
4. Setzer, D.R., McGrogan, M., Nunberg, J.H. and Schminke, R.T. (1980) *Cell* 22, 361-370
5. Hagenbüchle, O., Tosi, M., Schibler, U., Bovey, R., Wellauer, P.K. and Young, R.A. (1981) *Nature* 289, 643-646
6. Lamb, R.A. and Lai, C.J. (1980) *Cell* 21, 475-485
7. Cohen, L.H., Westerhuis, L.W., de Jong, W.W. and Bloemendal, H. (1978) *Eur. J. Biochem.* 89, 259-266
8. Berns, A.J.M., Strous, G.J.A.M. and Bloemendal, H. (1972) *Nature New Biol.* 236, 7-9
9. Cohen, L.H. Smits, D.P. and Bloemendal, H. (1976) *Eur. J. Biochem.* 67, 563-572
10. Cohen, L.H., Westerhuis, L.H., Smits, D.P. and Bloemendal, H. (1978) *Eur. J. Biochem.* 89, 251-258
11. de Jong, W.W., Cohen, L.H., Leunissen, J.A.M. and Zweers, A. (1980) *Biochem. Biophys. Res. Comm.* 96, 648-655
12. Dodemont, H.J., Andreoli, P.M. Moormann, R.J.M., Ramaekers, F.C.S., Schoenmakers, J.G.G. and Bloemendal, H. (1981) *Proc. Nat. Acad. Sci. USA* in press
13. Clewell, D.D. and Helinski, D.R. (1970) *Biochemistry* 9, 4428-4440
14. Palmiter, R.D. (1974) *Biochemistry* 13, 3606-3615
15. Bailey, J.M. and Davidson, N. (1976) *Anal. Biochem.* 70, 75-85
16. Thomas, P. (1980) *Proc. Nat. Acad. Sci. USA* 77, 5201-5205
17. Wahl, G.M., Stern, M. and Stark, G.R. (1979) *Proc. Nat. Acad. Sci. USA* 76, 3683-3687
18. Pelham, H.R.B. and Jackson, R.J. (1976) *Eur. J. Biochem.* 67, 247-253
19. Bonner, W.J. and Laskey, R.A. (1974) *Eur. J. Biochem.* 46, 83-88
20. van Wezenbeek, P.M.G., Hulsebos, T.J.M. and Schoenmakers, J.G.G. (1980) *Gene* 11, 129-148
21. Maxam, A. and Gilbert, W. (1977) *Proc. Nat. Acad. Sci. USA* 74, 560-564
22. Sanger, F. and Coulson, A.R. (1978) *FEBS Lett.* 87, 107-110
23. Proudfoot, N.J. and Brownlee, G.G. (1976) *Nature* 263, 211-214
24. Fitzgerald, M. and Shenk, T. (1981) *Cell* 24, 251-260
25. Favre, A., Bertazzoni, U., Berns, A.J.M. and Bloemendal, H. (1974) *Biochem. Biophys. Res. Comm.* 56, 273-280
26. Akusjärvi, G. Zabielski, J., Perricaudet, M. and Petterson, U. (1981) *Nucleic Acids Res.* 9, 1-17
27. Kronenberg, H.M., Roberts, B.E. and Efstratiadis, A. (1979) *Nucleic Acids Res.* 6, 153-166
28. Sutcliffe, J.G. (1978) *Nucleic Acids Res.* 5, 2721-2728
